# Supplementary material for: VEGFR2 promotes tumorigenesis and metastasis in a pro-angiogenic-independent way in gastric cancer
Source: BMC Cancer. 2019 Feb 28;19:183. doi: 10.1186/s12885-019-5322-0 (PMC6393973; doi:10.1186/s12885-019-5322-0)
Supplement: Supplementary file 1 — The data of microarray analysis of VEGFR2 signaling in gastric cancer cells. (XLSX 18770 kb) [file 12885_2019_5322_MOESM1_ESM.xlsx]

## Sheet: Normalized_Data
Probe

## Sheet: Differential Data
Probe

## Sheet: Diff Data(UP)
Probe

## Sheet: Diff Data(Down)
Probe

## Sheet: Raw_Data
Probe

## Sheet: ReadMe
原始数据文件提供多个表单如下： 表单 Slide lists：提供了数据文件名称，样本标签，芯片条码，芯片标签等信息。 表单 Normalized_Data：提供了所有样本的标准化数据，以及每个探针的表达差异信息，以及每个探针的注释信息等。 表单 Diff Genes Number：提供了差异基因列表中上下调差异统计情况。 表单 Differential Data：提供了所有差异基因的标准化数据，差异信息以及注释信息。 表单 Diff Data(UP)：提供了上调差异基因的标准化数据，差异信息以及注释信息。 表单 Diff Data(Down)：提供了下调差异基因的标准化数据，差异信息以及注释信息。 表单 Raw_Data：提供了原始所有探针未经标准化的原始表达值。 该文件提供了芯片中所有探针（probe）的原始信号值（raw）、标准化后信号值（normalized）、T-test的P值…
